# Supplementary material
Source: PubMed Central journal article supplement (PMC3651370)

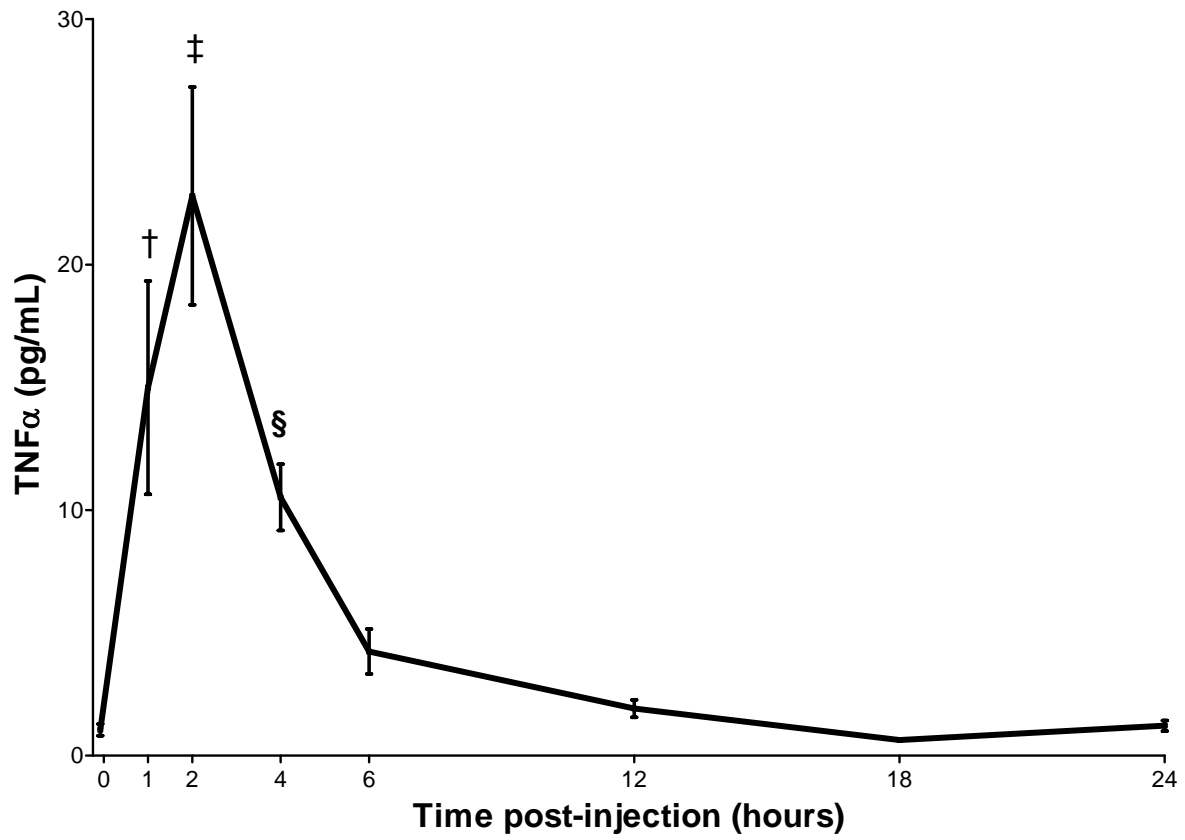

Supplement: NIHMS134548-supplement-01.pdf [file NIHMS134548-supplement-01.pdf]

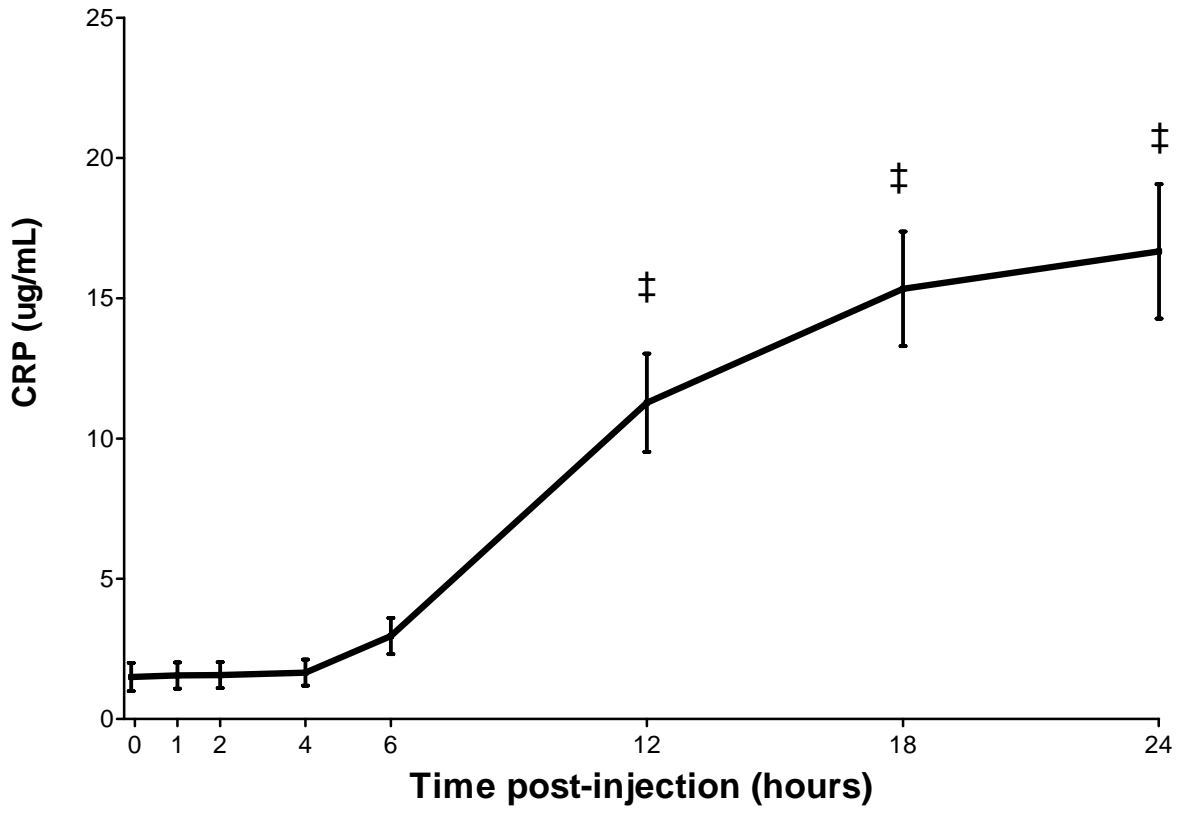

Supplement: NIHMS134548-supplement-02.pdf [file NIHMS134548-supplement-02.pdf]

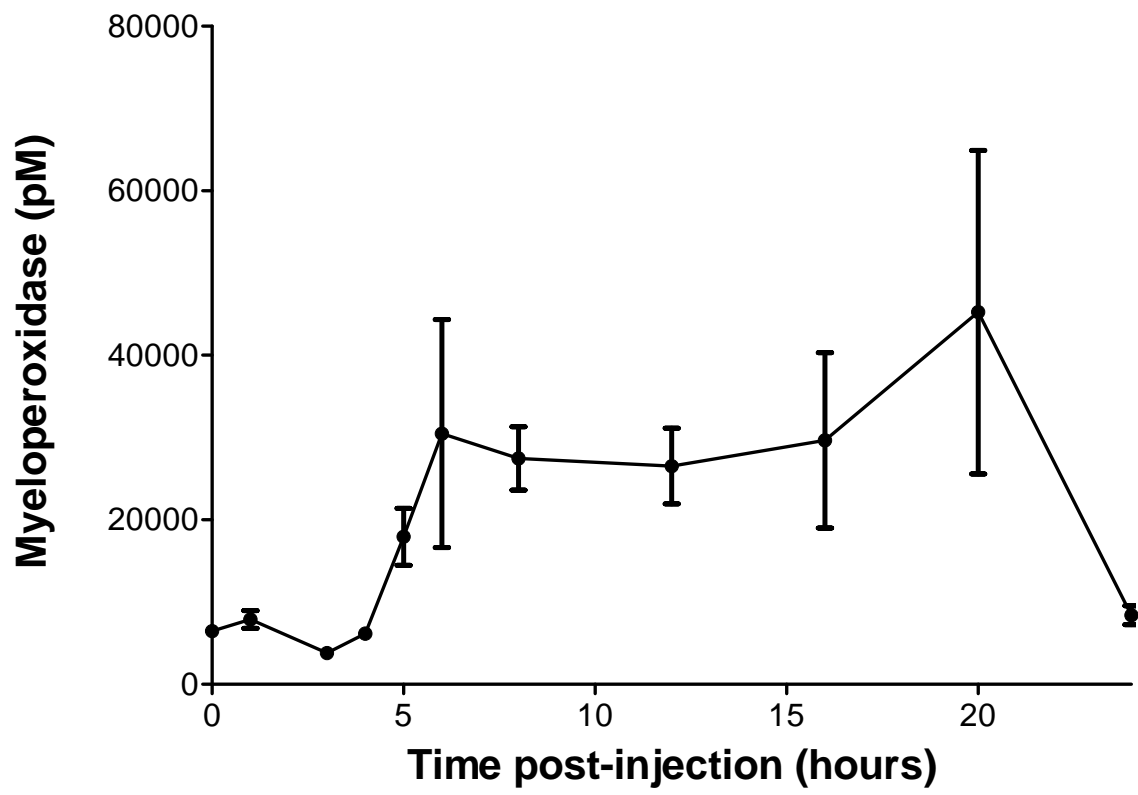

Supplement: NIHMS134548-supplement-03.pdf [file NIHMS134548-supplement-03.pdf]

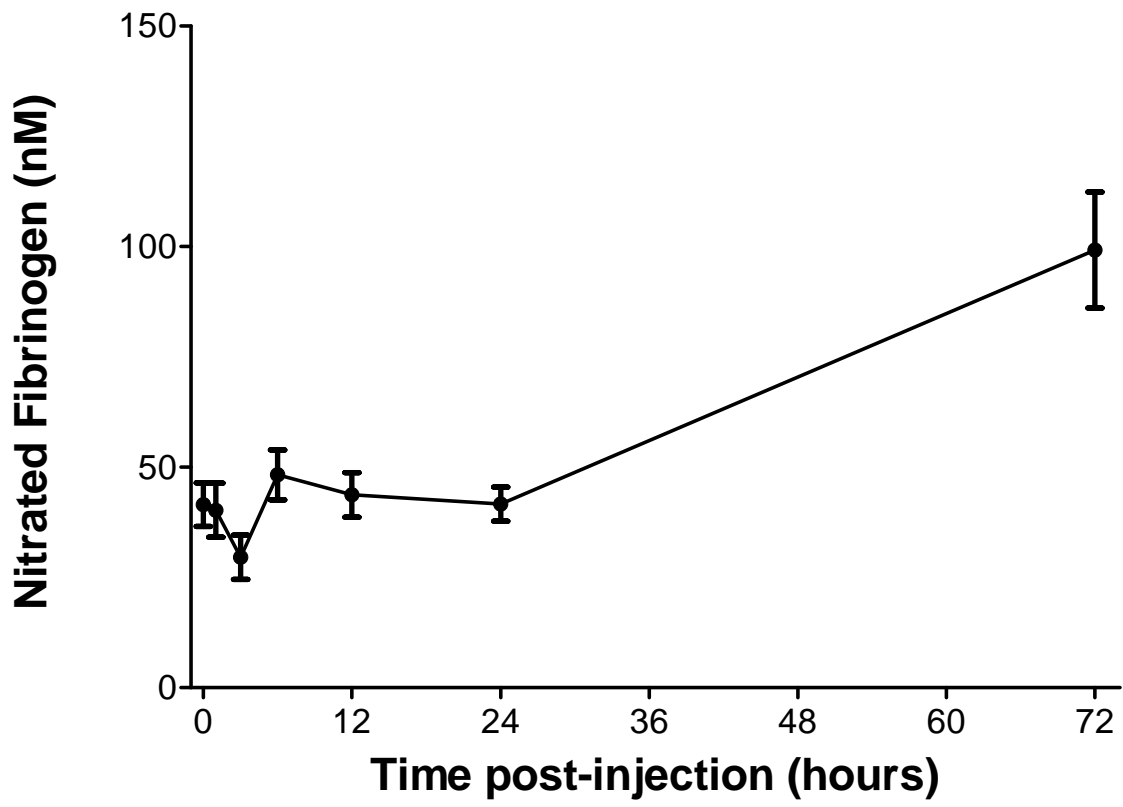

Supplement: NIHMS134548-supplement-04.pdf [file NIHMS134548-supplement-04.pdf]
